# Supplementary material
Source: publisher site journal article supplement (https://jhr.pensoft.net/article/73161/download/suppl/33/)
Supplement: Supplementary file 1

## Sheet: Sheet1
Supporting Information File S3
Data matrix of characters used in the phylogenetic analyses
Taxa		Character
Family	Species	1	2	3	4	5	6	7	8	9	10	11	12	13	14	15	16	17	18	19	20	21	22	23	24	25	26	27	28	29	30	31	32	33	34	35	36	37	38	39	40	41	42	43	44	45	46	47	48
Xyelidae	Macroxyela ferruginea	0	0	0	0	0	2	2	0	0	0	0	0	0	0	0	0	0	0	1	0	1	-	0	0	0	0	0	0	0	0	1	0	0	0	0	1	0	0	1	0	1	0	0	0	2	0	0	1
Pamphiliidae	Acantholyda erythrocephala	0	0	0	0	0	1	1	0	0	0	0	0	0	0	0	0	0	1	0	1	0	0	0	0	0	0	0	0	0	0	1	0	0	0	0	0	0	0	1	1	1	0	0	0	2	0	0	1
Cephidae	Cephus nigrinus	0	0	0	0	0	1	0	0	0	0	0	0	0	0	0	0	0	1	0	1	0	0	0	0	0	1	0	0	1	0	0	0	0	0	0	0	0	1	1	0	0	0	1	0	0	2	1	1
Siricidae	Sirex nigricornis	1	0	0	0	0	1	0	1	1	0	1	-	1	1	1	1	1	0	0	0	0	1	0	0	0	0	0	0	0	0	2	2	0	1	0	0	0	0	-	-	1	0	0	0	0	2	0	1
Siricidae	Urocerus gigas	1	0	1	0	0	0	0	1	1	0	1	-	1	1	1	1	1	0	1	0	0	1	0	0	0	0	0	0	0	0	2	2	0	1	0	0	0	0	-	-	1	0	0	0	1	2	0	1
Xiphydriidae	Xiphydria camelus	1	1	1	0	0	0	1	1	1	1	0	1	2	0	1	0	?	0	0	0	0	1	0	0	0	1	0	0	0	0	1	0	0	0	0	0	1	1	1	0	0	0	0	0	0	1	1	1
Orussidae	Orussus abietinus	1	0	0	0	0	1	1	1	1	1	1	-	2	0	1	1	?	0	0	1	1	-	0	0	0	1	2	0	-	1	-	0	0	0	-	0	-	-	0	0	0	0	0	0	0	1	-	-
Anaxyelidae	Cretosyntexis montsecensis	?	?	?	1	?	1	0	?	?	?	0	0	0	?	?	0	?	?	?	?	?	?	0	2	0	1	2	1	-	1	-	0	0	0	0	1	-	-	0	0	1	1	0	0	0	2	1	1
Anaxyelidae	Curiosyntexis magadanicus	?	0	1	1	0	1	0	?	?	?	0	0	0	?	?	0	?	?	0	0	?	?	1	2	?	1	1	1	-	1	-	0	0	0	2	1	1	-	-	-	1	1	0	1	0	2	1	0
Anaxyelidae	Daosyntexis primus	?	?	?	1	1	0	0	?	?	?	0	0	0	?	?	0	?	?	0	1	?	?	0	1	0	1	0	1	1	0	0	0	0	0	0	2	1	1	1	0	1	0	0	0	0	2	1	0
Anaxyelidae	Dolichosyntexis transbaikalicus	?	?	?	?	?	?	?	?	?	?	?	?	?	?	?	?	?	?	?	?	?	?	?	2	1	1	0	1	1	0	0	0	0	0	0	1	1	1	1	0	1	1	0	?	1	2	?	?
Anaxyelidae	Eosyntexis catalonicus	?	0	?	1	1	0	0	?	?	?	0	0	?	?	0	0	?	?	0	1	?	?	0	2	0	1	2	1	-	1	-	0	0	0	2	1	1	-	-	-	1	1	1	0	0	2	1	1
Anaxyelidae	Syntexis libocedrii	1	0	0	1	0	1	0	0	1	0	0	1	0	0	0	0	0	1	0	0	0	1	1	2	0	1	0	1	1	0	0	0	0	0	2	1	1	1	-	-	0	1	0	1	0	2	0	1
Anaxyelidae	Sclerosyntexis hirsuta	?	1	1	1	1	0	1	0	1	0	0	1	0	0	0	0	0	1	?	?	?	?	0	2	0	1	2	1	-	1	-	0	1	0	1	1	-	-	-	-	0	1	0	0	0	2	1	1
Anaxyelidae	Parasyntexis khasurtensis	?	?	?	?	?	?	?	?	?	?	?	?	?	?	?	?	?	?	?	?	?	?	0	0	0	1	0	1	1	0	0	0	1	0	1	1	1	1	-	-	0	1	0	0	0	2	1	1
Anaxyelidae	Orthosyntexis trimaculata gen. et sp. nov.	1	0	1	1	1	0	0	0	1	0	0	1	0	0	0	0	0	0	0	1	0	1	0	1	0	1	2	1	-	1	-	1	1	0	1	0	-	-	-	-	1	0	0	0	0	2	1	1
Anaxyelidae	Orthosyntexis thanti sp. nov.	1	1	1	1	1	0	0	0	1	0	0	1	0	0	0	0	0	0	0	1	0	1	0	1	0	1	2	1	-	1	-	0	1	0	1	0	-	-	-	-	1	0	0	0	0	2	1	1
Anaxyelidae	Dolichostigma tenuipes	?	?	?	?	?	?	?	?	?	?	?	?	?	?	?	?	?	?	?	?	?	?	0	2	1	1	0	1	1	0	1	0	0	1	0	2	1	1	-	-	1	0	0	0	0	0	0	1
Anaxyelidae	Kempendaja jacutensis	?	?	?	?	?	?	?	?	?	?	?	?	?	?	?	?	?	?	?	?	?	?	1	0	0	1	0	1	0	0	1	0	0	0	0	2	1	1	0	0	1	1	1	0	1	0	1	1
Anaxyelidae	Mangus magnus	?	?	?	?	?	?	?	?	?	?	?	?	?	?	?	?	?	?	?	?	?	?	1	1	0	0	0	1	0	0	1	0	0	0	0	1	0	0	0	1	1	1	0	0	1	2	0	1
Anaxyelidae	Anasyntexis strophandra	?	0	?	?	?	0	0	?	?	?	?	?	?	?	?	?	?	?	?	?	?	?	0	0	0	?	0	1	0	0	2	0	0	0	0	1	1	0	0	0	1	1	0	0	0	2	0	1
Anaxyelidae	Anaxyela gracilis	?	0	1	1	1	0	0	?	?	?	0	1	0	?	0	0	?	?	1	0	?	?	1	0	0	1	0	1	0	0	1	0	0	0	0	2	1	1	1	0	1	1	0	0	1	2	1	0
Anaxyelidae	Brachysyntexis robusta	?	?	?	1	0	0	1	?	?	?	0	0	0	?	0	0	?	?	0	1	?	?	0	1	0	1	0	1	0	0	1	0	0	0	0	1	1	0	0	0	1	1	1	0	0	2	1	0
Anaxyelidae	Kulbastavia grandis	?	?	?	?	?	?	?	?	?	?	?	?	?	?	?	?	?	?	2	0	?	?	0	0	0	1	0	1	0	0	1	0	0	0	0	2	1	1	1	1	1	1	0	0	1	0	1	1
Anaxyelidae	Sphenosyntexis pallicornis	?	?	?	?	?	?	?	?	?	?	?	?	?	?	0	?	?	?	1	0	?	?	1	0	0	1	0	1	0	0	1	0	0	0	0	1	1	1	0	1	1	1	0	0	0	2	1	1
Anaxyelidae	Syntexyela continentalis	?	1	1	1	0	1	1	?	?	?	?	?	?	?	?	?	?	?	1	0	?	?	0	0	0	1	0	1	0	0	1	0	0	0	0	1	1	0	1	0	1	1	0	0	1	1	0	?
Anaxyelidae	Urosyntexis undosa	?	0	1	1	1	0	0	?	?	?	0	0	?	?	?	0	?	?	2	0	?	?	0	0	0	1	0	1	0	0	1	0	0	0	0	2	1	1	0	0	1	1	0	0	0	1	0	0
[truncated: 15 more columns]
